# Supplementary material for: Characterization and Degradation Analysis of Pigments in Paintings by Martiros Sarian: Attenuated Total Reflection Fourier Transform Infrared Spectroscopic Imaging and X-ray Fluorescence Approach
Source: MDPI journal article supplement (doi:10.3390/heritage6100354), 2023-10-17
Supplement: s1 [file s1]

# Characterization and Degradation Analysis of Pigments in Paintings by Martiros Sarian: Attenuated Total Reflection Fourier Transform Infrared Spectroscopic Imaging and X-ray Fluorescence Approach

Guan-Lin Liu and Sergei G. Kazarian \*

Department of Chemical Engineering, Imperial College London, South Kensington Campus, London SW7 2AZ, UK; g.liu19@imperial.ac.uk

\* Correspondence: s.kazarian@imperial.ac.uk

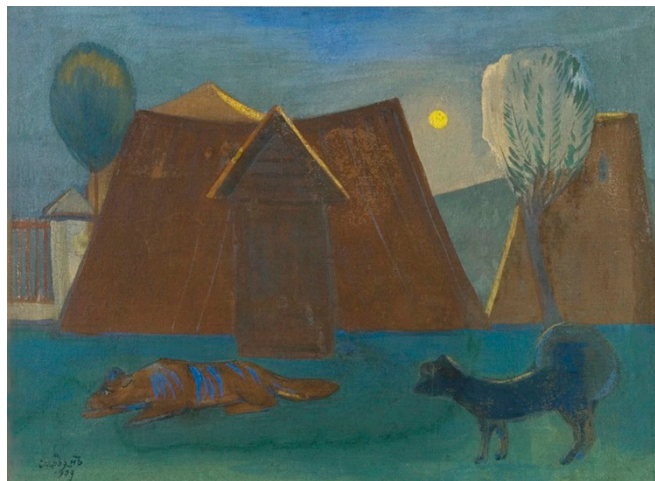

(a)

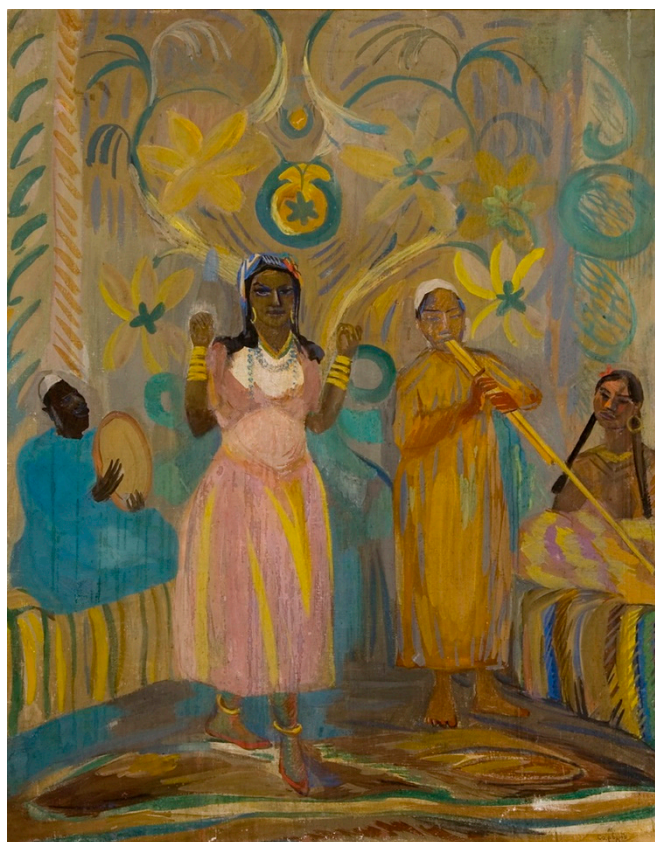

(b)

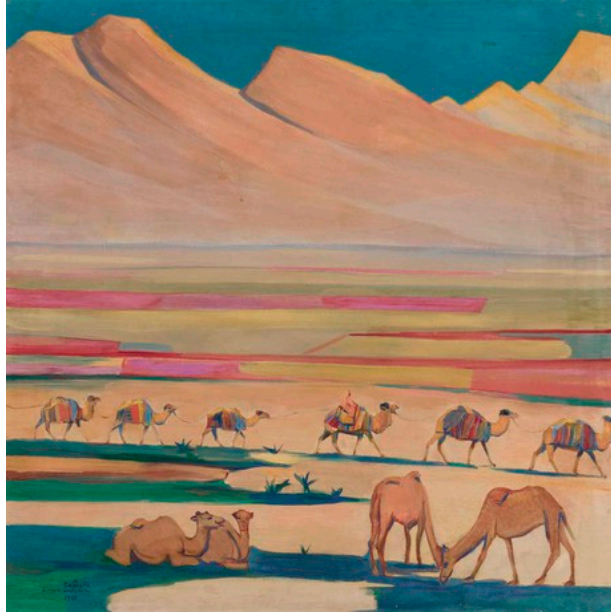

(c)

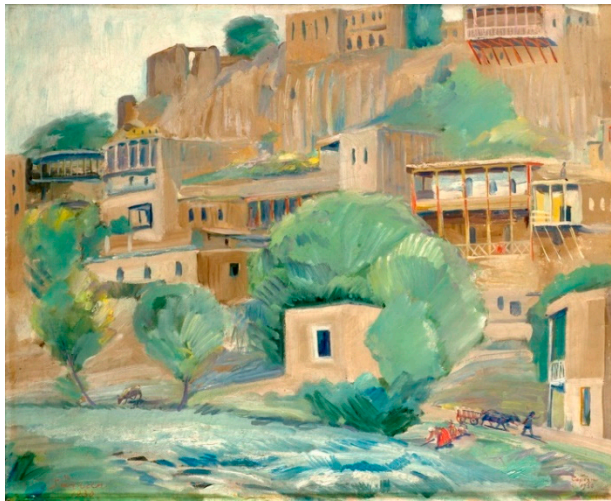

(d)

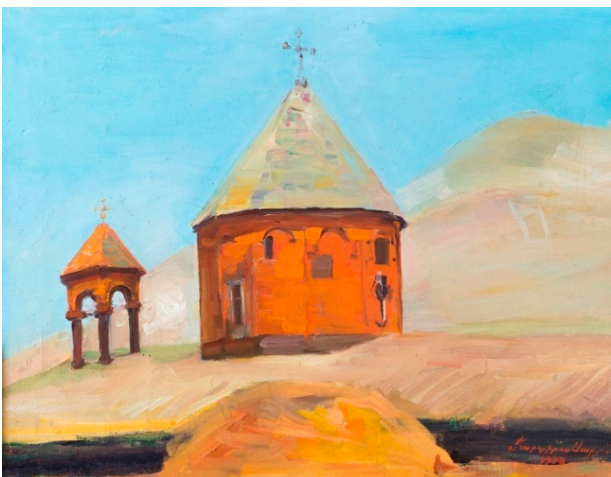

(e)

**Figure S1.** Five paintings housed at the Martiros Sarian House-Museum in Armenia: (a) *Morning in Stavrino* (1909), (b) *Arabian Dancer* (1913), (c) *Caravan* (1926), (d) *Yerevan Zangu River* (1931), and (e) *Kirovakan* (1948). Those pictures of the paintings are provided by Sophie Sarian, the Chief Curator at Martiros Sarian House-Museum.

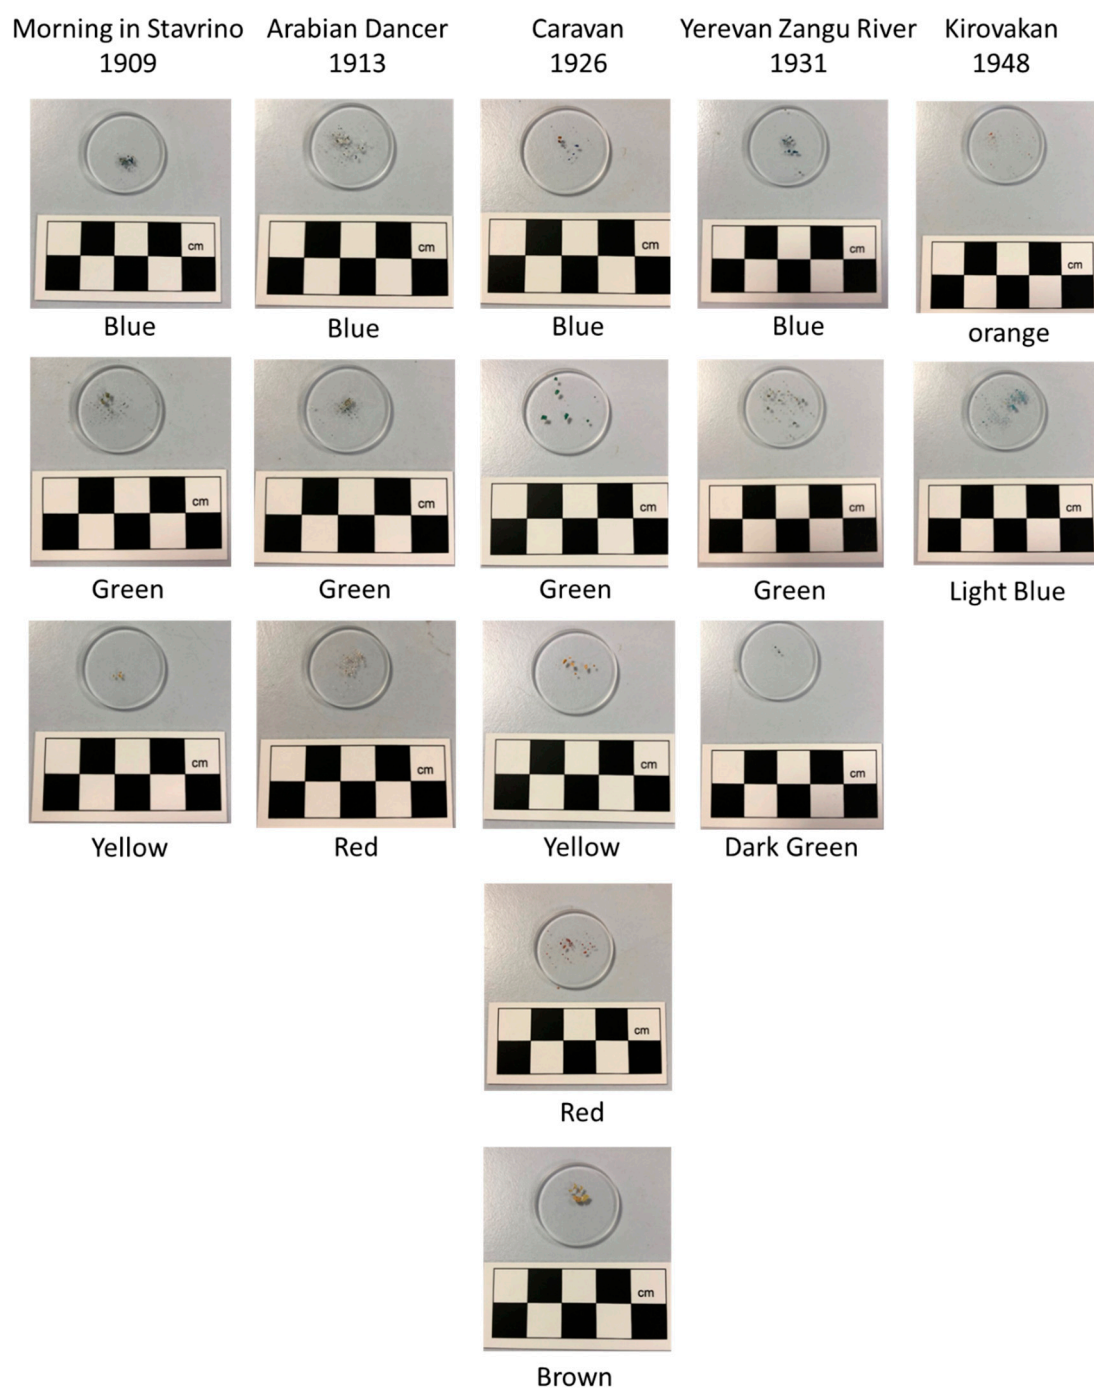

**Figure S2** Pigment powder samples on the CaF<sub>2</sub> plate

**Table S1** XRF data of the blue and the light blue pigments

| Color                | Blue                              |           |                              |           |                       |           |                                   |          | Light blue              |           |
|----------------------|-----------------------------------|-----------|------------------------------|-----------|-----------------------|-----------|-----------------------------------|----------|-------------------------|-----------|
| Painting             | <i>Morning in Stavrino (1909)</i> |           | <i>Arabian Dancer (1913)</i> |           | <i>Caravan (1926)</i> |           | <i>Yerevan Zangu River (1931)</i> |          | <i>Kirovakan (1948)</i> |           |
| Quality/<br>Quantity | Zn                                | 41.475 %  | Zn                           | 70.761 %  | Pb                    | 62.298 %  | Zn                                | 45.931 % | Zn                      | 90.243 %  |
|                      | Ca                                | 18.057 %  | Si                           | 6.478 %   | Ca                    | 13.065 %  | Sn                                | 27.969 % | Ca                      | 3.597 %   |
|                      | S                                 | 9.69 %    | S                            | 5.27 %    | Co                    | 5.647 %   | Co                                | 13.582 % | Sn                      | 1.911 %   |
|                      | Si                                | 7.504 %   | Al                           | 4.711 %   | Al                    | 4.862 %   | Si                                | 3.953 %  | Co                      | 1.658 %   |
|                      | Cr                                | 6.499 %   | Ca                           | 3.769 %   | Fe                    | 3.895 %   | Ca                                | 3.805 %  | Si                      | 0.993 %   |
|                      | Al                                | 5.213 %   | Pb                           | 2.574 %   | Zn                    | 3.839 %   | Fe                                | 1.873 %  | S                       | 0.706 %   |
|                      | Pb                                | 3.69 %    | Fe                           | 2.534 %   | S                     | 3.606 %   | Cl                                | 1.694 %  | Cl                      | 0.402 %   |
|                      | Cl                                | 2.715 %   | K                            | 0.951 %   | Cd                    | 1.42 %    | Cr                                | 1.027 %  | Fe                      | 0.209 %   |
|                      | Fe                                | 2.268 %   | Cl                           | 0.761 %   | Cl                    | 0.869 %   | As                                | 0.167 %  | Cu                      | 965.8 ppm |
|                      | Ti                                | 0.763 %   | P                            | 0.575 %   | Cr                    | 0.209 %   |                                   |          | As                      | 914.8 ppm |
|                      | Cu                                | 0.538 %   | Cd                           | 0.467 %   | V                     | 0.121 %   |                                   |          | Cr                      | 460.7 ppm |
|                      | As                                | 0.484 %   | Cr                           | 0.381 %   | Sr                    | 859.5 ppm |                                   |          | P                       | 456.7 ppm |
|                      | P                                 | 0.364 %   | As                           | 0.211 %   | Ga                    | 828.1 ppm |                                   |          |                         |           |
|                      | Cd                                | 0.227 %   | Ga                           | 0.147 %   |                       |           |                                   |          |                         |           |
|                      | Co                                | 0.22 %    | Co                           | 0.131 %   |                       |           |                                   |          |                         |           |
|                      | Mn                                | 917.6 ppm | Cu                           | 0.107 %   |                       |           |                                   |          |                         |           |
|                      | Ga                                | 789.1 ppm | Ti                           | 988.7 ppm |                       |           |                                   |          |                         |           |
|                      | Ni                                | 674.9 ppm | Mn                           | 527.8 ppm |                       |           |                                   |          |                         |           |
|                      | Sr                                | 544.2 ppm | V                            | 199.7 ppm |                       |           |                                   |          |                         |           |
|                      |                                   |           |                              |           |                       |           |                                   |          |                         |           |
|                      |                                   |           |                              |           |                       |           |                                   |          |                         |           |
|                      |                                   |           |                              |           |                       |           |                                   |          |                         |           |
|                      |                                   |           |                              |           |                       |           |                                   |          |                         |           |
|                      |                                   |           |                              |           |                       |           |                                   |          |                         |           |
|                      |                                   |           |                              |           |                       |           |                                   |          |                         |           |
|                      |                                   |           |                              |           |                       |           |                                   |          |                         |           |
|                      |                                   |           |                              |           |                       |           |                                   |          |                         |           |
|                      |                                   |           |                              |           |                       |           |                                   |          |                         |           |

\* In the obtained XRF results, specific elements are observed to exhibit a concentration of 0 ppm. This occurrence stems from the fact that while these elements were detected during the qualitative analysis phase, their corresponding signals were of insufficient strength to facilitate accurate quantification in the subsequent quantitative analysis.

**Table S2** XRF data of the green and the blue-green pigments

| Color                | Green                              |           |                              |           |                                   |           |                       |           | Blue-green            |           |
|----------------------|------------------------------------|-----------|------------------------------|-----------|-----------------------------------|-----------|-----------------------|-----------|-----------------------|-----------|
| Painting             | <i>Morning in Stavrinio (1909)</i> |           | <i>Arabian Dancer (1913)</i> |           | <i>Yerevan Zangu River (1931)</i> |           | <i>Caravan (1926)</i> |           | <i>Caravan (1926)</i> |           |
| Quality/<br>Quantity | Ca                                 | 72.222 %  | Zn                           | 64.572 %  | Zn                                | 54.605 %  | Pb                    | 75.037 %  | Pb                    | 73.932 %  |
|                      | Cr                                 | 7.424 %   | Na                           | 8.699 %   | Pb                                | 14.551 %  | Ca                    | 9.221 %   | As                    | 9.722 %   |
|                      | Si                                 | 3.865 %   | S                            | 6.005 %   | Si                                | 9.074 %   | Cr                    | 7.785 %   | Cu                    | 7.015 %   |
|                      | S                                  | 3.552 %   | Si                           | 4.28 %    | Ca                                | 6.237 %   | Mg                    | 3.855 %   | Ca                    | 5.173 %   |
|                      | Al                                 | 3.359 %   | Ca                           | 4.131 %   | Al                                | 4.801 %   | Fe                    | 1.284 %   | Co                    | 2.143 %   |
|                      | Fe                                 | 3.228 %   | Al                           | 2.94 %    | Fe                                | 2.801 %   | Zn                    | 1.086 %   | Zn                    | 0.841 %   |
|                      | Zn                                 | 2.794 %   | Cr                           | 2.331 %   | S                                 | 1.84 %    | Cd                    | 0.764 %   | Fe                    | 0.451 %   |
|                      | Cl                                 | 1.217 %   | Fe                           | 2.106 %   | Cl                                | 1.816 %   | Cl                    | 0.714 %   | Cl                    | 0.311 %   |
|                      | P                                  | 1.08 %    | Pb                           | 1.578 %   | Cr                                | 1.369 %   | Ti                    | 0.116 %   | Sn                    | 0.174 %   |
|                      | Pb                                 | 0.418 %   | Ti                           | 1.505 %   | Co                                | 1.246 %   | Sr                    | 690.2 ppm | Sr                    | 863.2 ppm |
|                      | Co                                 | 0.399 %   | P                            | 0.683 %   | As                                | 0.756 %   | Mn                    | 502.5 ppm | Cr                    | 757.2 ppm |
|                      | Ti                                 | 0.2 %     | Cl                           | 0.418 %   | Er                                | 0.598 %   | Zr                    | 195.8 ppm | Ti                    | 655 ppm   |
|                      | Cu                                 | 0.127 %   | Co                           | 0.296 %   | V                                 | 0.124 %   |                       |           | Zr                    | 105.3 ppm |
|                      | As                                 | 649.7 ppm | Cd                           | 0.2 %     | Ga                                | 0.107 %   |                       |           |                       |           |
|                      | Mn                                 | 505.8 ppm | Sn                           | 913 ppm   | Mn                                | 747.8 ppm |                       |           |                       |           |
|                      |                                    |           | As                           | 868.2 ppm |                                   |           |                       |           |                       |           |
|                      |                                    |           | Sr                           | 790.6 ppm |                                   |           |                       |           |                       |           |
|                      |                                    |           |                              |           |                                   |           |                       |           |                       |           |
|                      |                                    |           |                              |           |                                   |           |                       |           |                       |           |
|                      |                                    |           |                              |           |                                   |           |                       |           |                       |           |
|                      |                                    |           |                              |           |                                   |           |                       |           |                       |           |
|                      |                                    |           |                              |           |                                   |           |                       |           |                       |           |
|                      |                                    |           |                              |           |                                   |           |                       |           |                       |           |
|                      |                                    |           |                              |           |                                   |           |                       |           |                       |           |
|                      |                                    |           |                              |           |                                   |           |                       |           |                       |           |

**Table S3** XRF data of the yellow and the brown pigments

| Color                | Yellow                             |          |                       |          | Brown                 |           |
|----------------------|------------------------------------|----------|-----------------------|----------|-----------------------|-----------|
| Painting             | <i>Morning in Stavrinio (1909)</i> |          | <i>Caravan (1926)</i> |          | <i>Caravan (1926)</i> |           |
| Quality/<br>Quantity | Si                                 | 24.419 % | Pb                    | 87.827 % | Pb                    | 92.339 %  |
|                      | Ca                                 | 21.482 % | Ca                    | 4.994 %  | Ca                    | 3.044 %   |
|                      | Zn                                 | 14.826 % | Cd                    | 2.742 %  | Cd                    | 2.339 %   |
|                      | Cl                                 | 8.94 %   | Ti                    | 1.219 %  | Zn                    | 1.055 %   |
|                      | Pb                                 | 7.658 %  | Cl                    | 1.063 %  | Al                    | 0.346 %   |
|                      | S                                  | 7.583 %  | Fe                    | 0.851 %  | Fe                    | 0.305 %   |
|                      | Fe                                 | 7.213 %  | Zn                    | 0.737 %  | Cr                    | 0.193 %   |
|                      | Cr                                 | 2.975 %  | V                     | 0.253 %  | Co                    | 0.16 %    |
|                      | Sn                                 | 2.479 %  | Cr                    | 0.211 %  | Sr                    | 777.8 ppm |
|                      | Ti                                 | 2.041 %  | Sr                    | 828.5 %  | Ti                    | 632.3 ppm |
|                      | As                                 | 0.383 %  | Zr                    | 208.9 %  | Cu                    | 446 ppm   |
|                      |                                    |          |                       |          | Zr                    | 320.7 ppm |
|                      |                                    |          |                       |          | Rb                    | 20.5 ppm  |
|                      |                                    |          |                       |          |                       |           |
|                      |                                    |          |                       |          |                       |           |
|                      |                                    |          |                       |          |                       |           |
|                      |                                    |          |                       |          |                       |           |
|                      |                                    |          |                       |          |                       |           |
|                      |                                    |          |                       |          |                       |           |
|                      |                                    |          |                       |          |                       |           |
|                      |                                    |          |                       |          |                       |           |

**Table S4** XRF data of the red and the orange pigments

| Color                | Red                          |           |                       |          | Orange                  |          |
|----------------------|------------------------------|-----------|-----------------------|----------|-------------------------|----------|
| Painting             | <i>Arabian Dancer</i> (1913) |           | <i>Caravan</i> (1926) |          | <i>Kirovakan</i> (1948) |          |
| Quality/<br>Quantity | Zn                           | 63.831 %  | Pb                    | 45.645 % | Zn                      | 67.757 % |
|                      | Na                           | 12.947 %  | Cl                    | 19.636 % | Si                      | 12.517 % |
|                      | S                            | 9.227 %   | Co                    | 10 %     | Ca                      | 10.242 % |
|                      | Ca                           | 3.384 %   | Ca                    | 9.61 %   | Fe                      | 3.999 %  |
|                      | Al                           | 2.512 %   | P                     | 6.532 %  | Cl                      | 2.117 %  |
|                      | Si                           | 2.181 %   | Fe                    | 3.648 %  | S                       | 2.085 %  |
|                      | Cd                           | 1.433 %   | Zn                    | 2.52 %   | Ti                      | 0.389 %  |
|                      | Fe                           | 1.242 %   | Er                    | 1.841 %  | Cr                      | 0.341 %  |
|                      | P                            | 1.187 %   | Cr                    | 0.56 %   | V                       | 0.207 %  |
|                      | Cl                           | 0.612 %   | Ga                    | 87.5 ppm | As                      | 0.128 %  |
|                      | K                            | 0.427 %   |                       |          | Co                      | 0.119 %  |
|                      | As                           | 0.399 %   |                       |          |                         |          |
|                      | Cr                           | 0.372 %   |                       |          |                         |          |
|                      | Ti                           | 0.106 %   |                       |          |                         |          |
|                      | Co                           | 920.1 ppm |                       |          |                         |          |
|                      | Mn                           | 474.2 ppm |                       |          |                         |          |
|                      |                              |           |                       |          |                         |          |
|                      |                              |           |                       |          |                         |          |
|                      |                              |           |                       |          |                         |          |
|                      |                              |           |                       |          |                         |          |
|                      |                              |           |                       |          |                         |          |
